# Supplementary material
Source: ML conference proceedings conference paper supplement (https://proceedings.mlr.press/v139/trabucco21a.html)
Supplement: Supplementary file 1 [file trabucco21a-supp.zip]

Archive with 114 entries (87 files):
- supp/appendix.pdf
- supp/design-baselines/
- supp/design-baselines/.git/
- supp/design-baselines/.git/config
- supp/design-baselines/.git/description
- supp/design-baselines/.git/HEAD
- supp/design-baselines/.git/hooks/
- supp/design-baselines/.git/hooks/applypatch-msg.sample
- supp/design-baselines/.git/hooks/commit-msg.sample
- supp/design-baselines/.git/hooks/post-update.sample
- supp/design-baselines/.git/hooks/pre-applypatch.sample
- supp/design-baselines/.git/hooks/pre-commit.sample
- supp/design-baselines/.git/hooks/prepare-commit-msg.sample
- supp/design-baselines/.git/hooks/pre-push.sample
- supp/design-baselines/.git/hooks/pre-rebase.sample
- supp/design-baselines/.git/hooks/pre-receive.sample
- supp/design-baselines/.git/hooks/update.sample
- supp/design-baselines/.git/index
- supp/design-baselines/.git/info/
- supp/design-baselines/.git/info/exclude
- supp/design-baselines/.git/logs/
- supp/design-baselines/.git/logs/HEAD
- supp/design-baselines/.git/logs/refs/
- supp/design-baselines/.git/logs/refs/heads/
- supp/design-baselines/.git/logs/refs/heads/master
- supp/design-baselines/.git/logs/refs/remotes/
- supp/design-baselines/.git/logs/refs/remotes/origin/
- supp/design-baselines/.git/logs/refs/remotes/origin/HEAD
- supp/design-baselines/.git/objects/
- supp/design-baselines/.git/objects/info/
- supp/design-baselines/.git/objects/pack/
- supp/design-baselines/.git/objects/pack/pack-010627b77f9efb648e163234659afea8bb1d0609.idx
- supp/design-baselines/.git/objects/pack/pack-010627b77f9efb648e163234659afea8bb1d0609.pack
- supp/design-baselines/.git/packed-refs
- supp/design-baselines/.git/refs/
- supp/design-baselines/.git/refs/heads/
- supp/design-baselines/.git/refs/heads/master
- supp/design-baselines/.git/refs/remotes/
- supp/design-baselines/.git/refs/remotes/origin/
- supp/design-baselines/.git/refs/remotes/origin/HEAD
- supp/design-baselines/.git/refs/tags/
- supp/design-baselines/.gitignore
- supp/design-baselines/design_baselines/
- supp/design-baselines/design_baselines/__init__.py
- supp/design-baselines/design_baselines/autofocused_cbas/
- supp/design-baselines/design_baselines/autofocused_cbas/__init__.py
- supp/design-baselines/design_baselines/autofocused_cbas/experiments.py
- supp/design-baselines/design_baselines/autofocused_cbas/nets.py
- supp/design-baselines/design_baselines/autofocused_cbas/relabel_experiments.py
- supp/design-baselines/design_baselines/autofocused_cbas/trainers.py
- supp/design-baselines/design_baselines/bo_qei/
- supp/design-baselines/design_baselines/bo_qei/__init__.py
- supp/design-baselines/design_baselines/bo_qei/experiments.py
- supp/design-baselines/design_baselines/bo_qei/nets.py
- supp/design-baselines/design_baselines/bo_qei/relabel_experiments.py
- supp/design-baselines/design_baselines/bo_qei/trainers.py
- supp/design-baselines/design_baselines/cbas/
- supp/design-baselines/design_baselines/cbas/__init__.py
- supp/design-baselines/design_baselines/cbas/experiments.py
- supp/design-baselines/design_baselines/cbas/nets.py
- supp/design-baselines/design_baselines/cbas/relabel_experiments.py
- supp/design-baselines/design_baselines/cbas/trainers.py
- supp/design-baselines/design_baselines/cli.py
- supp/design-baselines/design_baselines/cma_es/
- supp/design-baselines/design_baselines/cma_es/__init__.py
- supp/design-baselines/design_baselines/cma_es/experiments.py
- supp/design-baselines/design_baselines/cma_es/nets.py
- supp/design-baselines/design_baselines/cma_es/relabel_experiments.py
- supp/design-baselines/design_baselines/cma_es/trainers.py
- supp/design-baselines/design_baselines/coms_cleaned/
- supp/design-baselines/design_baselines/coms_cleaned/__init__.py
- supp/design-baselines/design_baselines/coms_cleaned/experiments.py
- supp/design-baselines/design_baselines/coms_cleaned/nets.py
- supp/design-baselines/design_baselines/coms_cleaned/trainers.py
- supp/design-baselines/design_baselines/coms_original/
- supp/design-baselines/design_baselines/coms_original/__init__.py
- supp/design-baselines/design_baselines/coms_original/experiments.py
- supp/design-baselines/design_baselines/coms_original/nets.py
- supp/design-baselines/design_baselines/coms_original/trainers.py
- supp/design-baselines/design_baselines/data.py
- supp/design-baselines/design_baselines/gradient_ascent/
- supp/design-baselines/design_baselines/gradient_ascent/__init__.py
- supp/design-baselines/design_baselines/gradient_ascent/experiments.py
- supp/design-baselines/design_baselines/gradient_ascent/mean_ensemble_experiments.py
- supp/design-baselines/design_baselines/gradient_ascent/min_ensemble_experiments.py
- supp/design-baselines/design_baselines/gradient_ascent/nets.py
- supp/design-baselines/design_baselines/gradient_ascent/relabel_experiments.py
- supp/design-baselines/design_baselines/gradient_ascent/relabel_mean_ensemble_experiments.py
- supp/design-baselines/design_baselines/gradient_ascent/relabel_min_ensemble_experiments.py
- supp/design-baselines/design_baselines/gradient_ascent/trainers.py
- supp/design-baselines/design_baselines/logger.py
- supp/design-baselines/design_baselines/mins/
- supp/design-baselines/design_baselines/mins/__init__.py
- supp/design-baselines/design_baselines/mins/experiments.py
- supp/design-baselines/design_baselines/mins/nets.py
- supp/design-baselines/design_baselines/mins/relabel_experiments.py
- supp/design-baselines/design_baselines/mins/replay_buffer.py
- supp/design-baselines/design_baselines/mins/trainers.py
- supp/design-baselines/design_baselines/mins/utils.py
- supp/design-baselines/design_baselines/reinforce/
- supp/design-baselines/design_baselines/reinforce/__init__.py
- supp/design-baselines/design_baselines/reinforce/experiments.py
- supp/design-baselines/design_baselines/reinforce/nets.py
- supp/design-baselines/design_baselines/reinforce/online_experiments.py
- supp/design-baselines/design_baselines/reinforce/relabel_experiments.py
- supp/design-baselines/design_baselines/reinforce/trainers.py
- supp/design-baselines/design_baselines/utils.py
- supp/design-baselines/environment.yml
- supp/design-baselines/LICENSE
- supp/design-baselines/README.md
- supp/design-baselines/requirements.txt
- supp/design-baselines/setup.py
- supp/paper_plus_appendix.pdf
- supp/submission_code.txt
