# Supplementary material
Source: ML conference proceedings conference paper supplement (https://proceedings.mlr.press/v139/trabucco21a.html)
Supplement: Supplementary file 1 [file trabucco21a-supp.zip › supp/design-baselines/design_baselines/__init__.py]

import tensorflow as tf
for gpu in tf.config.experimental.list_physical_devices('GPU'):
    tf.config.experimental.set_memory_growth(gpu, True)
