# Supplementary material
Source: ML conference proceedings conference paper supplement (https://proceedings.mlr.press/v139/trabucco21a.html)
Supplement: Supplementary file 1 [file trabucco21a-supp.zip › supp/design-baselines/design_baselines/logger.py]

import tensorflow as tf
import tensorflow_probability as tfp


class Logger(object):

    def __init__(self,
                 logging_dir):
        """Creates a logging interface to a tensorboard file for
        visualizing in the tensorboard web interface; note that
        mean, max, min, and std are recorded

        Arguments:

        logging_dir: str
            the path on the disk to save records to
        """

        tf.io.gfile.makedirs(logging_dir)
        self.writer = tf.summary.create_file_writer(logging_dir)

    def record(self,
               key,
               value,
               step,
               percentile=False):
        """Log statistics about training data to tensorboard
        log files for visualization later

        Arguments:

        key: str
            the string name to use when logging data in tensorboard
            that determines groupings in the web interface
        value: tf.tensor
            the tensor of values to record statistics about
            typically is multi dimensional
        step: int
            the total number of environment steps collected so far
            typically on intervals of 10000
        """

        step = tf.cast(tf.convert_to_tensor(step), tf.int64)
        with self.writer.as_default():

            if tf.equal(tf.size(value), 1):

                # log one statistic of the incoming tensors
                tf.summary.scalar(key, tf.reshape(value, []), step=step)

            elif percentile:

                # log several statistics of the incoming tensors
                tf.summary.scalar(key + '/100th',
                                  tfp.stats.percentile(value, 100.0),
                                  step=step)
                tf.summary.scalar(key + '/90th',
                                  tfp.stats.percentile(value, 90.0),
                                  step=step)
                tf.summary.scalar(key + '/80th',
                                  tfp.stats.percentile(value, 80.0),
                                  step=step)
                tf.summary.scalar(key + '/50th',
                                  tfp.stats.percentile(value, 50.0),
                                  step=step)

            else:

                # log several statistics of the incoming tensors
                tf.summary.scalar(key + '/max',
                                  tf.math.reduce_max(value),
                                  step=step)
                tf.summary.scalar(key + '/mean',
                                  tf.math.reduce_mean(value),
                                  step=step)
                tf.summary.scalar(key + '/min',
                                  tf.math.reduce_min(value),
                                  step=step)
                tf.summary.scalar(key + '/std',
                                  tf.math.reduce_std(value),
                                  step=step)
