# Supplementary material
Source: ML conference proceedings conference paper supplement (https://proceedings.mlr.press/v139/trabucco21a.html)
Supplement: Supplementary file 1 [file trabucco21a-supp.zip › supp/design-baselines/environment.yml]

name: design-baselines
channels:
- defaults
- conda-forge
dependencies:
- python>=3.7,<3.8
- pip>=20.0
- conda>=4.7
- cudatoolkit=10.1
- cudnn=7.6
- pip:
    - -r ./requirements.txt
