# Supplementary material
Source: ML conference proceedings conference paper supplement (https://proceedings.mlr.press/v139/trabucco21a.html)
Supplement: Supplementary file 1 [file trabucco21a-supp.zip › supp/design-baselines/requirements.txt]

absl-py==0.12.0
aiohttp==3.6.2
aiohttp-cors==0.7.0
aioredis==1.3.1
argon2-cffi==20.1.0
astunparse==1.6.3
async-timeout==3.0.1
attrs==19.3.0
backcall==0.2.0
beautifulsoup4==4.9.1
biopython==1.78
bleach==3.1.5
blessings==1.7
boto3==1.16.19
botocore==1.19.19
botorch==0.3.3
brotlipy==0.7.0
cachetools==4.1.1
certifi==2020.6.20
chardet==3.0.4
click==7.1.2
cloudpickle==1.3.0
cma==3.0.3
colorama==0.4.3
colorful==0.5.4
conda==4.10.1
cycler==0.10.0
Cython==0.29.21
decorator==4.4.2
defusedxml==0.6.0
dm-tree==0.1.5
docker==4.3.0
entrypoints==0.3
fasteners==0.16
filelock==3.0.12
flatbuffers==1.12
future==0.18.2
gast==0.3.3
glfw==1.12.0
google==3.0.0
google-api-core==1.22.2
google-auth==1.21.3
google-auth-oauthlib==0.4.1
google-pasta==0.2.0
googleapis-common-protos==1.52.0
gpustat==0.6.0
gpytorch==1.3.0
grpcio==1.32.0
gym==0.12.5
h5py==2.10.0
hiredis==1.1.0
huggingface-hub==0.0.8
imageio==2.9.0
importlib-metadata==1.7.0
ipdb==0.13.4
ipykernel==5.3.4
ipython==7.17.0
ipython-genutils==0.2.0
ipywidgets==7.5.1
jedi==0.17.2
Jinja2==2.11.2
jmespath==0.10.0
joblib==1.0.0
jsonschema==3.2.0
jupyter==1.0.0
jupyter-client==6.1.6
jupyter-console==6.1.0
jupyter-core==4.6.3
Keras-Preprocessing==1.1.2
kiwisolver==1.2.0
lmdb==1.0.0
lockfile==0.12.2
Markdown==3.2.2
MarkupSafe==1.1.1
matplotlib==3.3.0
mistune==0.8.4
msgpack==1.0.0
mujoco-py==2.0.2.3
multidict==4.7.6
nbconvert==5.6.1
nbformat==5.0.7
notebook==6.1.1
numpy==1.18.5
nvidia-ml-py3==7.352.0
oauthlib==3.1.0
opencensus==0.7.10
opencensus-context==0.1.1
opt-einsum==3.3.0
packaging==20.4
pandas==1.0.5
pandocfilters==1.4.2
parso==0.7.1
pexpect==4.8.0
pickleshare==0.7.5
Pillow==7.2.0
prometheus-client==0.8.0
prompt-toolkit==3.0.6
protobuf==3.17.1
psutil==5.7.2
ptyprocess==0.6.0
py-spy==0.3.3
pyasn1==0.4.8
pyasn1-modules==0.2.8
pycosat==0.6.3
pyglet==1.5.0
Pygments==2.6.1
pyparsing==2.4.7
pyrsistent==0.16.0
python-dateutil==2.8.1
pytz==2020.1
PyYAML==5.3.1
pyzmq==19.0.2
qtconsole==4.7.5
QtPy==1.9.0
ray==1.3.0
redis==3.5.3
regex==2021.4.4
requests-oauthlib==1.3.0
robel==0.1.2
rsa==4.6
ruamel.yaml==0.15.87
s3transfer==0.3.3
sacremoses==0.0.45
scikit-learn==0.23.1
scikit-video==1.1.11
scipy==1.6.0
seaborn==0.11.0
Send2Trash==1.5.0
soupsieve==2.0.1
tabulate==0.8.7
tape-proteins==0.3
tensorboard==2.5.0
tensorboard-data-server==0.6.1
tensorboard-plugin-wit==1.7.0
tensorboardX==2.1
tensorflow==2.3.2
tensorflow-estimator==2.3.0
tensorflow-probability==0.11.0
termcolor==1.1.0
terminado==0.8.3
testpath==0.4.4
threadpoolctl==2.1.0
tokenizers==0.10.2
torch==1.7.1
tornado==6.0.4
tqdm==4.56.0
traitlets==4.3.3
transformers==4.6.1
transforms3d==0.3.1
typing-extensions==3.7.4.3
wcwidth==0.2.5
webencodings==0.5.1
websocket-client==0.57.0
Werkzeug==1.0.1
widgetsnbextension==3.5.1
wrapt==1.12.1
yarl==1.4.2
zipp==3.1.0
design-bench[all]==2.0.11
morphing-agents==1.5.1
-e .
